# Supplementary material for: Mechanisms of palmitic acid-conjugated antisense oligonucleotide distribution in mice
Source: PubMed Central journal article supplement (PMC7192618; doi:10.1093/nar/gkaa164), 2020-03-17
Supplement: gkaa164_supplemental_file.pdf [file gkaa164_supplemental_file.pdf]

Supplemental Figure S1: Graphs of relative abundance of plasma proteins identified in mouse plasmas of different strains of mice

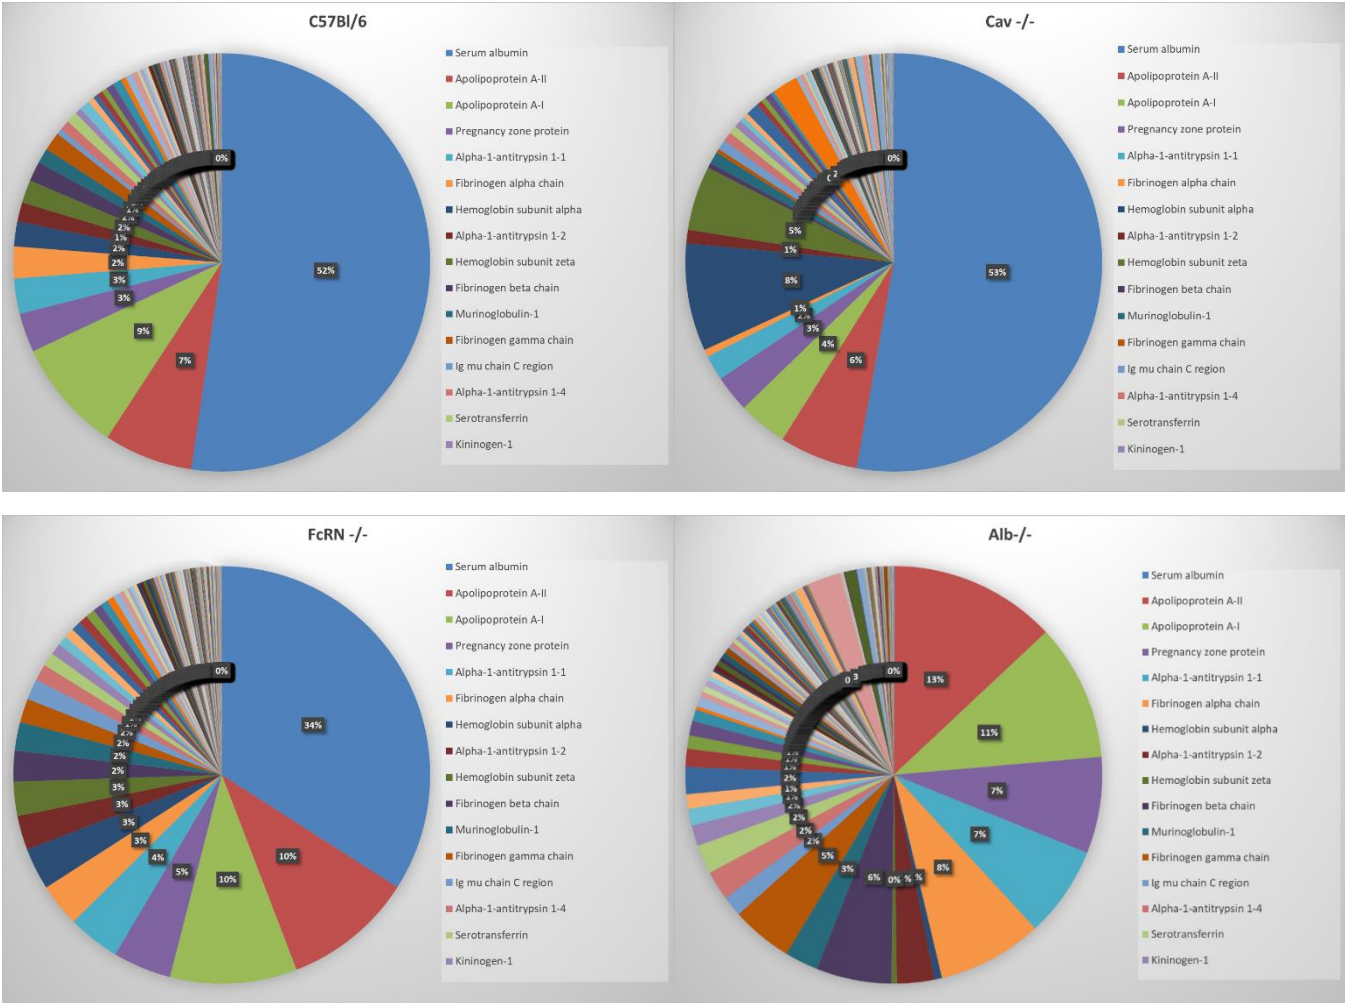

Supplemental Table S1: List of relative protein abundance

| Accession | Gene Name | Protein Name                                            | C57Bl/6 | Cav-/- | FcRN-/- | Alb-/- |
|-----------|-----------|---------------------------------------------------------|---------|--------|---------|--------|
| PO7724    | Alb       | Serum albumin                                           | 52.35   | 52.86  | 34.05   | 0.07   |
| P06728    | Apoa4     | Apolipoprotein A-II                                     | 6.89    | 6.10   | 10.11   | 12.95  |
| P09813    | Apoa2     | Apolipoprotein A-I                                      | 8.78    | 3.81   | 9.85    | 10.60  |
| P55302    | Lrpap1    | Pregnancy zone protein                                  | 3.02    | 2.85   | 4.53    | 7.48   |
| P07758    | Serpina1a | Alpha-1-antitrypsin 1-1                                 | 2.72    | 1.95   | 4.05    | 7.05   |
| Q8K0E8    | Fgb       | Fibrinogen alpha chain                                  | 2.47    | 0.57   | 3.35    | 8.14   |
| P01942    | Hba       | Hemoglobin subunit alpha                                | 1.91    | 8.33   | 3.25    | 0.58   |
| P22599    | Serpina1b | Alpha-1-antitrypsin 1-2                                 | 1.49    | 1.05   | 2.65    | 2.89   |
| P06467    | Hbz       | Hemoglobin subunit zeta                                 | 1.77    | 4.98   | 2.65    | 0.42   |
| Q8VCM7    | Fgg       | Fibrinogen beta chain                                   | 1.53    | 0.40   | 2.39    | 5.83   |
| P28665    | Mug1      | Murinoglobulin-1                                        | 1.17    | 0.93   | 2.21    | 2.61   |
| Q71KU9    | Fgl1      | Fibrinogen gamma chain                                  | 1.44    | 0.32   | 1.84    | 4.75   |
| P01872    | Ighm      | Ig mu chain C region                                    | 0.44    | 0.77   | 1.61    | 1.58   |
| Q00897    | Serpina1d | Alpha-1-antitrypsin 1-4                                 | 0.78    | 0.74   | 1.28    | 2.28   |
| P05366    | Saa1      | Serotransferrin                                         | 0.88    | 0.62   | 1.05    | 2.25   |
| O08677    | Kng1      | Kininogen-1                                             | 0.49    | 0.58   | 0.90    | 1.61   |
| Q00898    | Serpina1e | Alpha-1-antitrypsin 1-5                                 | 0.82    | 0.39   | 0.76    | 1.29   |
| P01887    | B2m       | Beta-2-glycoprotein 1                                   | 0.48    | 0.39   | 0.76    | 1.14   |
| P01837    | N/A       | Ig kappa chain C region                                 | 0.37    | 1.02   | 0.74    | 2.09   |
| P33587    | Proc      | Vitamin D-binding protein                               | 0.44    | 0.42   | 0.72    | 1.41   |
| E9Q414    | Apob      | Apolipoprotein A-IV                                     | 0.39    | 0.39   | 0.71    | 1.03   |
| P41317    | Mbl2      | Mannose-binding protein C                               | 0.62    | 0.53   | 0.68    | 1.13   |
| Q60590    | Orm1      | Alpha-1-acid glycoprotein 1                             | 0.67    | 0.25   | 0.61    | 0.89   |
| P02088    | Hbb-b1    | Hemoglobin subunit beta-1                               | 0.40    | 2.02   | 0.55    | 0.28   |
| Q9Z1R3    | Apom      | Apolipoprotein E                                        | 0.53    | 0.32   | 0.53    | 0.76   |
| Q91X72    | Hpx       | Hemopexin                                               | 0.46    | 0.34   | 0.38    | 0.43   |
| Q61233    | Lcp1      | Plasminogen                                             | 0.21    | 0.16   | 0.29    | 0.48   |
| Q9CQI6    | Cotl1     | Clusterin                                               | 0.31    | 0.12   | 0.29    | 0.48   |
| P03995    | Gfap      | Gelsolin                                                | 0.20    | 0.25   | 0.26    | 0.37   |
| P06909    | Cfh       | Complement component C9                                 | 0.21    | 0.08   | 0.26    | 0.41   |
| P04945    | N/A       | Ig kappa chain V-VI region NQ2-6.1                      | 0.07    | 0.07   | 0.26    | 0.15   |
| Q00623    | Apoa1     | Antithrombin-III                                        | 0.21    | 0.05   | 0.26    | 0.41   |
| P01029    | C4b       | Complement C3                                           | 0.15    | 0.13   | 0.24    | 0.38   |
| Q01102    | Selp      | Prothrombin                                             | 0.18    | 0.10   | 0.22    | 0.31   |
| Q8VCT4    | Ces1d     | Carboxylesterase 1C                                     | 0.15    | 0.17   | 0.21    | 0.41   |
| Q92111    | Tf        | Serine protease inhibitor A3N                           | 0.16    | 0.09   | 0.19    | 0.47   |
| P01898    | H2-Q10    | H-2 class I histocompatibility antigen, Q10 alpha chain | 0.11    | 0.10   | 0.17    | 0.21   |
| E9PV24    | Fga       | Fetuin-B                                                | 0.12    | 0.13   | 0.16    | 0.34   |
| P14847    | Crp       | Corticosteroid-binding globulin                         | 0.09    | 0.14   | 0.15    | 0.34   |
| P29788    | Vtn       | Vitronectin                                             | 0.18    | 0.14   | 0.15    | 0.30   |
| Q9WVJ3    | Cpq       | Carboxypeptidase N subunit 2                            | 0.12    | 0.09   | 0.15    | 0.20   |

|        |           |                                                      |      |      |      |      |
|--------|-----------|------------------------------------------------------|------|------|------|------|
| O70165 | Fcn1      | Fibronectin                                          | 0.10 | 0.08 | 0.14 | 0.30 |
| Q9ESB3 | Hrg       | Histidine-rich glycoprotein                          | 0.08 | 0.08 | 0.14 | 0.23 |
| P06684 | C5        | Complement C4-B                                      | 0.11 | 0.10 | 0.13 | 0.29 |
| P70274 | Sepp1     | Retinol-binding protein 4                            | 0.10 | 0.06 | 0.13 | 0.14 |
| Q61176 | Arg1      | Apolipoprotein M                                     | 0.11 | 0.10 | 0.13 | 0.16 |
| P47791 | Gsr       | Glutathione peroxidase 3                             | 0.09 | 0.09 | 0.12 | 0.23 |
| Q8BH61 | F13a1     | Coagulation factor XII                               | 0.08 | 0.08 | 0.12 | 0.22 |
| P06683 | C9        | Complement component C8 gamma chain                  | 0.09 | 0.05 | 0.12 | 0.18 |
| Q9D7Q1 | Chit1     | Ceruloplasmin                                        | 0.07 | 0.08 | 0.11 | 0.20 |
| Q64726 | Azgp1     | Zinc-alpha-2-glycoprotein                            | 0.08 | 0.07 | 0.11 | 0.17 |
| P51910 | Apod      | Apolipoprotein C-IV                                  | 0.06 | 0.04 | 0.10 | 0.12 |
| P20918 | Plg       | Plasma protease C1 inhibitor                         | 0.10 | 0.05 | 0.10 | 0.22 |
| Q8BH35 | C8b       | Complement component C8 alpha chain                  | 0.10 | 0.05 | 0.10 | 0.20 |
| Q8VCG4 | C8g       | Complement component C8 beta chain                   | 0.09 | 0.06 | 0.10 | 0.23 |
| Q61247 | Serpinf2  | Alpha-2-antiplasmin                                  | 0.07 | 0.04 | 0.09 | 0.13 |
| P01592 | Jchain    | Immunoglobulin J chain                               | 0.03 | 0.07 | 0.09 | 0.11 |
| Q9DBD0 | Ica       | Inhibitor of carbonic anhydrase                      | 0.06 | 0.06 | 0.09 | 0.13 |
| Q61702 | Itih1     | Inter-alpha-trypsin inhibitor heavy chain H3         | 0.07 | 0.07 | 0.09 | 0.23 |
| O89020 | Afm       | Afamin                                               | 0.04 | 0.06 | 0.09 | 0.15 |
| P11680 | Cfp       | Properdin                                            | 0.06 | 0.05 | 0.08 | 0.14 |
| O70362 | Gpld1     | Phosphatidylinositol-glycan-specific phospholipase D | 0.06 | 0.05 | 0.08 | 0.10 |
| Q61704 | Itih3     | Inter-alpha-trypsin inhibitor heavy chain H2         | 0.05 | 0.07 | 0.08 | 0.21 |
| Q61730 | Il1rap    | Interleukin-1 receptor accessory protein             | 0.05 | 0.04 | 0.07 | 0.11 |
| P03987 | N/A       | Ig gamma-3 chain C region                            | 0.09 | 0.14 | 0.07 | 0.20 |
| P39039 | Mbl1      | Mannose-binding protein A                            | 0.07 | 0.04 | 0.06 | 0.08 |
| A6X935 | Itih4     | Inter alpha-trypsin inhibitor, heavy chain 4         | 0.06 | 0.06 | 0.06 | 0.21 |
| P05367 | Saa2      | Serum amyloid A-2 protein                            | 0.06 | 0.00 | 0.06 | 0.24 |
| P49182 | Serpind1  | Heparin cofactor 2                                   | 0.04 | 0.03 | 0.06 | 0.08 |
| Q02105 | C1qc      | Complement C1q subcomponent subunit B                | 0.08 | 0.04 | 0.05 | 0.10 |
| P31532 | Saa4      | Serum amyloid A-1 protein                            | 0.05 | 0.00 | 0.05 | 0.23 |
| P01867 | Igh-3     | Ig gamma-2B chain C region                           | 0.14 | 0.39 | 0.05 | 0.66 |
| Q61268 | Apoc4     | Apolipoprotein B-100                                 | 0.05 | 0.03 | 0.05 | 0.12 |
| Q61703 | Itih2     | Inter-alpha-trypsin inhibitor heavy chain H1         | 0.03 | 0.03 | 0.05 | 0.10 |
| Q80YC5 | F12       | Coagulation factor X                                 | 0.04 | 0.03 | 0.04 | 0.04 |
| P29621 | Serpina3c | Selenoprotein P                                      | 0.03 | 0.02 | 0.04 | 0.05 |

|        |            |                                                |      |      |      |      |
|--------|------------|------------------------------------------------|------|------|------|------|
| Q9DBB9 | Cpn2       | Carboxypeptidase N catalytic chain             | 0.03 | 0.03 | 0.04 | 0.07 |
| Q3UZ09 | C1rl       | Complement C1q subcomponent subunit C          | 0.03 | 0.03 | 0.04 | 0.11 |
| P58771 | Tpm1       | Transthyretin                                  | 0.02 | 0.50 | 0.04 | 0.07 |
| P01864 | N/A        | Ig gamma-2A chain C region secreted form       | 0.11 | 0.43 | 0.04 | 2.51 |
| O08997 | Atox1      | Complement factor I                            | 0.03 | 0.03 | 0.04 | 0.07 |
| P51885 | Lum        | Lumican                                        | 0.03 | 0.03 | 0.04 | 0.06 |
| Q923D2 | Blvrb      | Ficolin-1                                      | 0.02 | 0.02 | 0.03 | 0.06 |
| Q8VCS0 | Pglyrp2    | N-acetylmuramoyl-L-alanine amidase             | 0.03 | 0.02 | 0.03 | 0.06 |
| P42703 | Lifr       | Leukemia inhibitory factor receptor            | 0.03 | 0.02 | 0.03 | 0.05 |
| P97290 | Serping1   | Plasma kallikrein                              | 0.02 | 0.02 | 0.03 | 0.06 |
| P12246 | Apcs       | Serum amyloid A-4 protein                      | 0.28 | 0.14 | 0.03 | 0.80 |
| P16301 | Lcat       | Phosphatidylcholine-sterol acyltransferase     | 0.03 | 0.02 | 0.03 | 0.04 |
| P62737 | Acta2      | Actin, cytoplasmic 2                           | 0.02 | 0.01 | 0.03 | 0.05 |
| P01635 | N/A        | Ig kappa chain V-V region K2 (Fragment)        | 0.01 | 0.01 | 0.03 | 0.02 |
| P01869 | Ighg1      | Ig gamma-1 chain C region, membrane-bound form | 0.25 | 0.60 | 0.03 | 0.52 |
| P21180 | C2         | Complement C1s-A subcomponent                  | 0.02 | 0.01 | 0.03 | 0.05 |
| Q9R098 | Hgfac      | Hepatocyte growth factor activator             | 0.02 | 0.02 | 0.03 | 0.05 |
| Q07968 | F13b       | Coagulation factor XIII A chain                | 0.02 | 0.01 | 0.03 | 0.05 |
| Q62087 | Pon3       | Serum paraoxonase/arylesterase 1               | 0.01 | 0.03 | 0.03 | 0.05 |
| P01750 | N/A        | Ig heavy chain V region 102                    | 0.02 | 0.04 | 0.03 | 0.05 |
| Q9JJN5 | Cpn1       | Carboxypeptidase B2                            | 0.02 | 0.01 | 0.02 | 0.06 |
| Q8R121 | Serpina10  | Protein Z-dependent protease inhibitor         | 0.01 | 0.01 | 0.02 | 0.04 |
| Q9Z0M6 | Cd97       | CD5 antigen-like                               | 0.01 | 0.02 | 0.02 | 0.03 |
| P16015 | Ca3        | Carbonic anhydrase 2                           | 0.02 | 0.04 | 0.02 | 0.03 |
| P01636 | N/A        | Ig kappa chain V-V region MOPC 149             | 0.01 | 0.02 | 0.02 | 0.09 |
| P01633 | Igk-V19-17 | Ig kappa chain V19-17                          | 0.02 | 0.06 | 0.02 | 0.14 |
| P21460 | Cst3       | C-reactive protein                             | 0.02 | 0.01 | 0.02 | 0.04 |
| P21550 | Eno3       | Beta-2-microglobulin                           | 0.02 | 0.01 | 0.02 | 0.02 |
| P14106 | C1qb       | Complement C1q subcomponent subunit A          | 0.01 | 0.01 | 0.02 | 0.04 |
| P47878 | Igfbp3     | Insulin-like growth factor-binding protein 3   | 0.00 | 0.00 | 0.02 | 0.01 |
| P01786 | N/A        | Ig heavy chain V region MOPC 47A               | 0.02 | 0.05 | 0.02 | 0.08 |

|        |           |                                                                        |      |      |      |      |
|--------|-----------|------------------------------------------------------------------------|------|------|------|------|
| P18760 | Cfl1      | Coagulation factor XIII B chain                                        | 0.01 | 0.01 | 0.02 | 0.03 |
| P97298 | Serpinf1  | Phospholipid transfer protein                                          | 0.02 | 0.02 | 0.02 | 0.04 |
| Q9DCW4 | Etfb      | EGF-containing fibulin-like extracellular matrix protein 1             | 0.01 | 0.01 | 0.02 | 0.03 |
| P47880 | Igfbp6    | Insulin-like growth factor-binding protein complex acid labile subunit | 0.01 | 0.01 | 0.02 | 0.02 |
| P01631 | N/A       | Ig kappa chain V-II region 26-10                                       | 0.01 | 0.02 | 0.02 | 0.05 |
| P35505 | Fah       | Fructose-bisphosphate aldolase A                                       | 0.00 | 0.01 | 0.01 | 0.03 |
| P04202 | Tgfb1     | Transcobalamin-2                                                       | 0.01 | 0.01 | 0.01 | 0.02 |
| Q07456 | Ambp      | Protein AMBP                                                           | 0.01 | 0.01 | 0.01 | 0.03 |
| Q91WP6 | Serpina3n | Serine protease inhibitor A3M                                          | 0.05 | 0.01 | 0.01 | 0.11 |
| Q8K182 | C8a       | Complement C5                                                          | 0.01 | 0.01 | 0.01 | 0.02 |
| O09164 | Sod3      | Extracellular matrix protein 1                                         | 0.01 | 0.01 | 0.01 | 0.02 |
| P01643 | N/A       | Ig kappa chain V-V region MOPC 173                                     | 0.01 | 0.01 | 0.01 | 0.01 |
| O08742 | Gp5       | Platelet glycoprotein Ib alpha chain                                   | 0.00 | 0.01 | 0.01 | 0.02 |
| Q9JM99 | Prg4      | Vitamin K-dependent protein C                                          | 0.01 | 0.01 | 0.01 | 0.02 |
| P09581 | Csf1r     | Macrophage colony-stimulating factor 1 receptor                        | 0.01 | 0.01 | 0.01 | 0.02 |
| P17182 | Eno1      | Alpha-amylase 1                                                        | 0.01 | 0.01 | 0.01 | 0.02 |
| P26262 | Klkb1     | Pigment epithelium-derived factor                                      | 0.01 | 0.01 | 0.01 | 0.02 |
| Q91Y97 | Aldob     | Fructose-bisphosphate aldolase B                                       | 0.00 | 0.00 | 0.01 | 0.01 |
| Q9DC11 | Plxdc2    | Platelet-activating factor acetylhydrolase                             | 0.01 | 0.00 | 0.01 | 0.02 |
| P07361 | Orm2      | Alpha-1-acid glycoprotein 2                                            | 0.01 | 0.01 | 0.01 | 0.04 |
| P60843 | Eif4a1    | Epidermal growth factor receptor                                       | 0.01 | 0.01 | 0.01 | 0.00 |
| Q9DCT8 | Crip2     | Cystatin-C                                                             | 0.01 | 0.01 | 0.01 | 0.01 |
| P32261 | Serpinc1  | Angiotensinogen                                                        | 0.01 | 0.01 | 0.01 | 0.02 |
| P70375 | F7        | Coagulation factor V                                                   | 0.01 | 0.01 | 0.01 | 0.02 |
| Q60994 | Adipoq    | Adiponectin                                                            | 0.00 | 0.01 | 0.01 | 0.01 |
| P01680 | N/A       | Ig kappa chain V-IV region S107B                                       | 0.01 | 0.01 | 0.01 | 0.03 |
| P05017 | Igf1      | Insulin-like growth factor I                                           | 0.00 | 0.00 | 0.01 | 0.01 |
| P08226 | Apoe      | Apolipoprotein D                                                       | 0.01 | 0.01 | 0.01 | 0.00 |
| P18337 | Sell      | L-selectin                                                             | 0.00 | 0.00 | 0.01 | 0.01 |
| Q93092 | Taldo1    | Thyroxine-binding globulin                                             | 0.00 | 0.00 | 0.01 | 0.02 |
| P97464 | Ext1      | Eukaryotic translation initiation factor 3 subunit E                   | 0.01 | 0.01 | 0.01 | 0.00 |
| Q9R0G6 | Comp      | Carboxypeptidase Q                                                     | 0.00 | 0.01 | 0.01 | 0.01 |
| O88783 | F5        | Coagulation factor IX                                                  | 0.00 | 0.00 | 0.01 | 0.01 |
| P26040 | Ezr       | Extracellular superoxide dismutase [Cu-Zn]                             | 0.00 | 0.01 | 0.01 | 0.01 |
| P00920 | Ca2       | Carbonic anhydrase 1                                                   | 0.00 | 0.01 | 0.01 | 0.00 |
| Q61171 | Prdx2     | Peroxiredoxin-2                                                        | 0.00 | 0.01 | 0.01 | 0.01 |

|        |           |                                         |      |      |      |      |
|--------|-----------|-----------------------------------------|------|------|------|------|
| Q61646 | Hp        | Haptoglobin                             | 0.02 | 0.00 | 0.01 | 0.29 |
| P01630 | N/A       | Ig kappa chain V-II region 7S34.1       | 0.01 | 0.20 | 0.01 | 0.04 |
| P26339 | Chga      | Cholinesterase                          | 0.00 | 0.00 | 0.01 | 0.01 |
| P07214 | Sparc     | Sorbitol dehydrogenase                  | 0.00 | 0.00 | 0.01 | 0.01 |
| Q08761 | Pros1     | Vitamin k-dependent protein s           | 0.00 | 0.00 | 0.01 | 0.01 |
| P08228 | Sod1      | Sulfhydryl oxidase 1                    | 0.00 | 0.00 | 0.01 | 0.01 |
| P98064 | Masp1     | Mannan-binding lectin serine protease 1 | 0.01 | 0.00 | 0.00 | 0.01 |
| O88947 | F10       | Coagulation factor VII                  | 0.01 | 0.00 | 0.00 | 0.01 |
| P35455 | Avp       | Vascular cell adhesion protein 1        | 0.00 | 0.00 | 0.00 | 0.01 |
| P26043 | Rdx       | Pyruvate kinase PKM                     | 0.00 | 0.00 | 0.00 | 0.01 |
| Q61129 | Cfi       | Complement factor H                     | 0.00 | 0.00 | 0.00 | 0.01 |
| P19221 | F2        | Proteoglycan 4                          | 0.00 | 0.00 | 0.00 | 0.02 |
| P55284 | Cdh5      | Cadherin-1                              | 0.00 | 0.00 | 0.00 | 0.00 |
| P99026 | Psmb4     | Proteasome subunit beta type-4          | 0.00 | 0.00 | 0.00 | 0.01 |
| Q06318 | Scgb1a1   | Uromodulin                              | 0.00 | 0.00 | 0.00 | 0.00 |
| Q9R1P4 | Psm1      | Proteasome subunit alpha type-6         | 0.00 | 0.00 | 0.00 | 0.01 |
| P16045 | Lgals1    | Fumarylacetoacetase                     | 0.00 | 0.00 | 0.00 | 0.00 |
| Q9CY50 | Ssr1      | Transketolase                           | 0.00 | 0.00 | 0.00 | 0.01 |
| Q01149 | Col1a2    | Collagen alpha-1(XII) chain             | 0.00 | 0.00 | 0.00 | 0.00 |
| P52480 | Pkm       | Pyruvate kinase PKLR                    | 0.00 | 0.00 | 0.00 | 0.01 |
| P09803 | Cdh1      | BPI fold-containing family A member 2   | 0.00 | 0.00 | 0.00 | 0.03 |
| Q9Z126 | Pf4       | Plastin-2                               | 0.00 | 0.00 | 0.00 | 0.01 |
| Q7TQ62 | Podn      | Plexin domain-containing protein 2      | 0.00 | 0.00 | 0.00 | 0.00 |
| P07743 | Bpifa2    | Bleomycin hydrolase                     | 0.00 | 0.00 | 0.00 | 0.01 |
| P98086 | C1qa      | Collectin-11                            | 0.00 | 0.00 | 0.00 | 0.00 |
| Q8C255 | Dpep2     | Di-N-acetylchitobiase                   | 0.00 | 0.00 | 0.00 | 0.00 |
| Q62356 | Fstl1     | Flavin reductase (NADPH)                | 0.00 | 0.01 | 0.00 | 0.00 |
| Q9CPY7 | Lap3      | Cytochrome c, somatic                   | 0.00 | 0.00 | 0.00 | 0.01 |
| P63260 | Actg1     | Actin, aortic smooth muscle             | 0.00 | 0.00 | 0.00 | 0.01 |
| P03976 | N/A       | Ig kappa chain V-II region 17S29.1      | 0.00 | 0.00 | 0.00 | 0.03 |
| P13597 | Icam1     | Intercellular adhesion molecule 1       | 0.00 | 0.00 | 0.00 | 0.00 |
| P18242 | Ctsd      | Cathepsin B                             | 0.00 | 0.00 | 0.00 | 0.00 |
| Q9WUU7 | Ctsz      | Cathepsin S                             | 0.00 | 0.00 | 0.00 | 0.01 |
| Q03734 | Serpina3m | Serine protease inhibitor A3C           | 0.00 | 0.00 | 0.00 | 0.00 |
| Q99K82 | Smox      | SPARC-like protein 1                    | 0.00 | 0.00 | 0.00 | 0.00 |
| Q61838 | Pzp       | Podocan                                 | 0.00 | 0.00 | 0.00 | 0.00 |
| Q9Z2U1 | Psm1      | Proteasome subunit alpha type-2         | 0.00 | 0.00 | 0.00 | 0.00 |
| P08121 | Col3a1    | Collagen alpha-1(I) chain               | 0.00 | 0.00 | 0.00 | 0.00 |
| O88998 | Olfm1     | Noelin                                  | 0.00 | 0.00 | 0.00 | 0.00 |
| Q8K135 | Kiaa0319l | Dipeptidase 2                           | 0.00 | 0.00 | 0.00 | 0.00 |
| P13595 | Ncam1     | Neural cell adhesion molecule 1         | 0.00 | 0.00 | 0.00 | 0.00 |
| Q91V98 | Cd248     | Endoplasmic reticulum aminopeptidase 1  | 0.00 | 0.00 | 0.00 | 0.00 |

|        |          |                                                       |      |      |      |      |
|--------|----------|-------------------------------------------------------|------|------|------|------|
| Q9Z1T2 | Thbs4    | Thrombospondin-1                                      | 0.00 | 0.00 | 0.00 | 0.00 |
| P29533 | Vcam1    | Uteroglobulin                                         | 0.00 | 0.00 | 0.00 | 0.00 |
| Q7TPR4 | Actn1    | Alpha-2-macroglobulin-P                               | 0.00 | 0.00 | 0.00 | 0.00 |
| P08071 | Ltf      | Lactotransferrin                                      | 0.00 | 0.00 | 0.00 | 0.00 |
| Q9QWK4 | Cd5l     | Cathepsin Z                                           | 0.00 | 0.00 | 0.00 | 0.00 |
| Q9CQF9 | Pcyox1   | Prenylcysteine oxidase                                | 0.00 | 0.00 | 0.00 | 0.00 |
| P09528 | Fth1     | Ezrin                                                 | 0.00 | 0.00 | 0.00 | 0.00 |
| Q8R016 | Blmh     | Bisphosphoglycerate mutase                            | 0.00 | 0.00 | 0.00 | 0.00 |
| Q06890 | Clu      | Chromogranin-A                                        | 0.00 | 0.00 | 0.00 | 0.00 |
| Q8QZR4 | Oaf      | Out at first protein homolog                          | 0.00 | 0.00 | 0.00 | 0.00 |
| P58802 | Tbc1d10a | Superoxide dismutase [Cu-Zn]                          | 0.00 | 0.00 | 0.00 | 0.00 |
| P62897 | Cycs     | Cysteine-rich protein 2                               | 0.00 | 0.00 | 0.00 | 0.00 |
| P00688 | Amy2     | Pancreatic alpha-amylase                              | 0.00 | 0.00 | 0.00 | 0.00 |
| Q9JHH6 | Cpb2     | Carboxylesterase 3A                                   | 0.00 | 0.00 | 0.00 | 0.00 |
| Q8K0D2 | Habp2    | Hyaluronan-binding protein 2                          | 0.00 | 0.00 | 0.00 | 0.00 |
| P10923 | Spp1     | Osteopontin                                           | 0.00 | 0.00 | 0.00 | 0.00 |
| P35700 | Prdx1    | Peroxiredoxin-1                                       | 0.00 | 0.00 | 0.00 | 0.00 |
| Q9DBP5 | Cmpk1    | Ubiquitin-like protein ISG15                          | 0.00 | 0.00 | 0.00 | 0.00 |
| P01674 | N/A      | Ig kappa chain V-III region PC 2154                   | 0.00 | 0.01 | 0.00 | 0.01 |
| Q02819 | Nucb1    | Nucleobindin-1                                        | 0.00 | 0.00 | 0.00 | 0.00 |
| Q01339 | Apoh     | Beta-1,4-galactosyltransferase 1                      | 0.00 | 0.00 | 0.00 | 0.00 |
| Q9QUM9 | Pasma6   | Proteasome subunit alpha type-1                       | 0.00 | 0.00 | 0.00 | 0.00 |
| Q91WP0 | Masp2    | Mannan-binding lectin serine protease 2               | 0.00 | 0.00 | 0.00 | 0.00 |
| P10404 | N/A      | MLV-related proviral Env polyprotein                  | 0.00 | 0.00 | 0.00 | 0.00 |
| P49722 | Pasma2   | Proteasome subunit alpha type-4                       | 0.00 | 0.00 | 0.00 | 0.00 |
| O88968 | Tcn2     | Transaldolase                                         | 0.00 | 0.00 | 0.00 | 0.00 |
| Q9R097 | Spint1   | Kunitz-type protease inhibitor 1                      | 0.00 | 0.00 | 0.00 | 0.00 |
| P56480 | Atp5b    | Arginase-1                                            | 0.00 | 0.00 | 0.00 | 0.00 |
| Q9Z0M9 | Il18bp   | Interleukin-18-binding protein                        | 0.00 | 0.00 | 0.00 | 0.00 |
| Q9R1P0 | Pasma4   | Proteasome subunit alpha type-5                       | 0.00 | 0.00 | 0.00 | 0.00 |
| P10493 | Nid1     | Nidogen-1                                             | 0.00 | 0.00 | 0.00 | 0.00 |
| P12399 | Ctla2a   | Protein CTLA-2-alpha                                  | 0.00 | 0.00 | 0.00 | 0.00 |
| Q91ZX7 | Lrp1     | Prolow-density lipoprotein receptor-related protein 1 | 0.00 | 0.00 | 0.00 | 0.00 |
| P55065 | Pltp     | Glycerol-3-phosphate phosphatase                      | 0.00 | 0.00 | 0.00 | 0.00 |
| P21614 | Gc       | Vinculin                                              | 0.00 | 0.00 | 0.00 | 0.00 |
| Q9D1H9 | Mfap4    | Microfibril-associated glycoprotein 4                 | 0.00 | 0.00 | 0.00 | 0.00 |
| O35930 | Gp1ba    | Platelet factor 4                                     | 0.00 | 0.00 | 0.00 | 0.00 |
| O08709 | Prdx6    | Peroxiredoxin-6                                       | 0.00 | 0.00 | 0.00 | 0.00 |
| Q60963 | Pla2g7   | Platelet glycoprotein V                               | 0.00 | 0.00 | 0.00 | 0.00 |
| Q64727 | Vcl      | Vasorin                                               | 0.00 | 0.00 | 0.00 | 0.00 |

|        |        |                                                                       |      |      |      |      |
|--------|--------|-----------------------------------------------------------------------|------|------|------|------|
| P11438 | Lamp1  | Lysosome-associated membrane glycoprotein 1                           | 0.00 | 0.00 | 0.00 | 0.00 |
| P13020 | Gsn    | Gamma-glutamyl hydrolase                                              | 0.00 | 0.00 | 0.00 | 0.00 |
| Q61468 | Msln   | Mesothelin                                                            | 0.00 | 0.00 | 0.00 | 0.00 |
| P70389 | Igfals | Insulin-like growth factor-binding protein 6                          | 0.00 | 0.00 | 0.00 | 0.00 |
| Q9CWJ9 | Atic   | Beta-enolase                                                          | 0.00 | 0.00 | 0.00 | 0.00 |
| O08689 | Mstn   | Growth/differentiation factor 8                                       | 0.00 | 0.00 | 0.00 | 0.00 |
| Q00724 | Rbp4   | Retinoic acid receptor responder protein 2                            | 0.00 | 0.00 | 0.00 | 0.00 |
| Q9CY02 | Ahsp   | Alpha-enolase                                                         | 0.00 | 0.00 | 0.00 | 0.00 |
| Q8R1U2 | Cgref1 | CD97 antigen                                                          | 0.00 | 0.00 | 0.00 | 0.00 |
| P53657 | Pklr   | P-selectin                                                            | 0.00 | 0.00 | 0.00 | 0.00 |
| P70296 | Pebp1  | Phosphatidylethanolamine-binding protein 1                            | 0.00 | 0.00 | 0.00 | 0.00 |
| P62962 | Pfn1   | Profilin-1                                                            | 0.00 | 0.00 | 0.00 | 0.00 |
| P10639 | Txn    | Tenascin                                                              | 0.00 | 0.00 | 0.00 | 0.00 |
| Q9Z0L8 | Ggh    | Galectin-1                                                            | 0.00 | 0.00 | 0.00 | 0.00 |
| O09159 | Man2b1 | Lysosomal alpha-mannosidase                                           | 0.00 | 0.00 | 0.00 | 0.00 |
| P35330 | Icam2  | Intercellular adhesion molecule 2                                     | 0.00 | 0.00 | 0.00 | 0.00 |
| P16125 | Ldhb   | L-lactate dehydrogenase b chain                                       | 0.00 | 0.00 | 0.00 | 0.00 |
| P28798 | Grn    | Granulins                                                             | 0.00 | 0.00 | 0.00 | 0.00 |
| O55042 | Snca   | Alpha-hemoglobin-stabilizing protein                                  | 0.00 | 0.00 | 0.00 | 0.00 |
| P31725 | S100a9 | Protein S100-A9                                                       | 0.00 | 0.00 | 0.00 | 0.00 |
| P62827 | Ran    | GTP-binding nuclear protein Ran                                       | 0.00 | 0.00 | 0.00 | 0.00 |
| Q8CHP8 | Pgp    | Glycerol-3-phosphate dehydrogenase [NAD(+)], cytoplasmic              | 0.00 | 0.00 | 0.00 | 0.00 |
| Q9CPU0 | Glo1   | Lactoylglutathione lyase                                              | 0.00 | 0.00 | 0.00 | 0.00 |
| O35955 | Psmb10 | Proteasome subunit beta type-10                                       | 0.00 | 0.00 | 0.00 | 0.00 |
| O70370 | Ctss   | Cathepsin D                                                           | 0.00 | 0.00 | 0.00 | 0.00 |
| Q64442 | Sord   | Serum paraoxonase/lactonase 3                                         | 0.00 | 0.00 | 0.00 | 0.00 |
| P10605 | Ctsb   | Cartilage oligomeric matrix protein                                   | 0.00 | 0.00 | 0.00 | 0.00 |
| Q80W65 | Pcsk9  | Proprotein convertase subtilisin/kexin type 9                         | 0.00 | 0.00 | 0.00 | 0.00 |
| Q01279 | Egfr   | Endosialin                                                            | 0.00 | 0.00 | 0.00 | 0.00 |
| P05064 | Aldoa  | Follistatin-related protein 1                                         | 0.00 | 0.00 | 0.00 | 0.00 |
| Q9ET01 | Pygl   | Glycogen phosphorylase, liver form                                    | 0.00 | 0.00 | 0.00 | 0.00 |
| O70251 | Eef1b  | Elongation factor 1-alpha 1                                           | 0.00 | 0.00 | 0.00 | 0.00 |
| P21570 | Ang    | Aminoacyl tRNA synthase complex-interacting multifunctional protein 1 | 0.00 | 0.00 | 0.00 | 0.00 |
| O09061 | Psmb1  | Proteasome subunit beta type-1                                        | 0.00 | 0.00 | 0.00 | 0.00 |



|        |          |                                                          |      |      |      |      |
|--------|----------|----------------------------------------------------------|------|------|------|------|
| Q63918 | Sdpr     | Serum amyloid P-component                                | 0.00 | 0.00 | 0.00 | 0.00 |
| Q61398 | Pcolce   | Procollagen C-endopeptidase enhancer 1                   | 0.00 | 0.00 | 0.00 | 0.00 |
| P51125 | Cast     | Cadherin-5                                               | 0.00 | 0.00 | 0.00 | 0.00 |
| O70456 | Sfn      | 14-3-3 protein sigma                                     | 0.00 | 0.00 | 0.00 | 0.00 |
| P16675 | Ctsa     | Lysosomal protective protein                             | 0.00 | 0.00 | 0.00 | 0.00 |
| Q91X17 | Umod     | UMP-CMP kinase                                           | 0.00 | 0.00 | 0.00 | 0.00 |
| Q6P253 | Dmkn     | Cytosol aminopeptidase                                   | 0.00 | 0.00 | 0.00 | 0.00 |
| Q64739 | Col11a2  | Collagen alpha-2(I) chain                                | 0.00 | 0.00 | 0.00 | 0.00 |
| P11499 | Hsp90ab1 | Heat shock protein HSP 90-beta                           | 0.00 | 0.00 | 0.00 | 0.00 |
| Q61147 | Cp       | Cell growth regulator with EF hand domain protein 1      | 0.00 | 0.00 | 0.00 | 0.00 |
| Q02858 | Tek      | Angiogenin                                               | 0.00 | 0.00 | 0.00 | 0.00 |
| P70663 | Sparcl1  | SPARC                                                    | 0.00 | 0.00 | 0.00 | 0.00 |
| Q8R4K8 | Pappa    | Pappalysin-1                                             | 0.00 | 0.00 | 0.00 | 0.00 |
| Q8CCK0 | H2afy2   | Copper transport protein ATOX1                           | 0.00 | 0.00 | 0.00 | 0.00 |
| Q9D8Y0 | Efhd2    | Dystroglycan                                             | 0.00 | 0.00 | 0.00 | 0.00 |
| Q9D358 | Acp1     | Low molecular weight phosphotyrosine protein phosphatase | 0.00 | 0.00 | 0.00 | 0.00 |
| Q9EPX2 | Papln    | Papilin                                                  | 0.00 | 0.00 | 0.00 | 0.00 |
| Q9D819 | Ppa1     | Inorganic pyrophosphatase                                | 0.00 | 0.00 | 0.00 | 0.00 |
| Q9DBG5 | Plin3    | Perilipin-3                                              | 0.00 | 0.00 | 0.00 | 0.00 |
| P13707 | Gpd1     | Glutathione S-transferase Mu 1                           | 0.00 | 0.00 | 0.00 | 0.00 |
| Q6GQT1 | A2m      | Alpha-2-macroglobulin receptor-associated protein        | 0.00 | 0.00 | 0.00 | 0.00 |
| P10649 | Gstm1    | Glutathione S-transferase A3                             | 0.00 | 0.00 | 0.00 | 0.00 |
| Q3UM45 | Ppp1r7   | Protein phosphatase 1 regulatory subunit 7               | 0.00 | 0.00 | 0.00 | 0.00 |
| Q9CQ60 | Pgls     | 6-phosphogluconolactonase                                | 0.00 | 0.00 | 0.00 | 0.00 |
| Q78PG9 | Ccdc25   | Cofilin-1                                                | 0.00 | 0.00 | 0.00 | 0.00 |
| P62806 | Hist1h4a | Histone H4                                               | 0.00 | 0.00 | 0.00 | 0.00 |
| Q8CG14 | C1sa     | Complement C1r subcomponent-like protein                 | 0.00 | 0.00 | 0.00 | 0.00 |
| Q62165 | Dag1     | Dyslexia-associated protein KIAA0319-like protein        | 0.00 | 0.00 | 0.00 | 0.00 |
| Q03311 | Bche     | Chitotriosidase-1                                        | 0.00 | 0.00 | 0.00 | 0.00 |
| Q02596 | Glycam1  | Glycosylation-dependent cell adhesion molecule 1         | 0.00 | 0.00 | 0.00 | 0.00 |
| Q9QXC1 | Fetub    | Ferritin heavy chain                                     | 0.00 | 0.00 | 0.00 | 0.00 |
| P00687 | Amy1     | Alpha-actinin-1                                          | 0.00 | 0.00 | 0.00 | 0.00 |
| P11276 | Fn1      | Fibrinogen-like protein 1                                | 0.00 | 0.00 | 0.00 | 0.00 |
| P63038 | Hspd1    | 60 kDa heat shock protein, mitochondrial                 | 0.00 | 0.00 | 0.00 | 0.00 |
| Q9CZT5 | Vasn     | Vasopressin-neurophysin 2-copeptin                       | 0.00 | 0.00 | 0.00 | 0.00 |

|        |          |                                                      |      |      |      |      |
|--------|----------|------------------------------------------------------|------|------|------|------|
| P21107 | Tpm3     | Tropomyosin alpha-1 chain                            | 0.00 | 0.00 | 0.00 | 0.00 |
| P61939 | Serpina7 | Thrombospondin-4                                     | 0.00 | 0.00 | 0.00 | 0.00 |
| O88685 | Psmc3    | 26S protease regulatory subunit 6A                   | 0.00 | 0.00 | 0.00 | 0.00 |
| Q9CR00 | Psmc9    | 26S proteasome non-ATPase regulatory subunit 9       | 0.00 | 0.00 | 0.00 | 0.00 |
| P25444 | Rps2     | 40S ribosomal protein S2                             | 0.00 | 0.00 | 0.00 | 0.00 |
| P60867 | Rps20    | 40S ribosomal protein S20                            | 0.00 | 0.00 | 0.00 | 0.00 |
| P20029 | Hspa5    | 78 kDa glucose-regulated protein                     | 0.00 | 0.00 | 0.00 | 0.00 |
| Q80T21 | Adamtsl4 | ADAMTS-like protein 4                                | 0.00 | 0.00 | 0.00 | 0.00 |
| Q8R2Z0 | Fam132a  | Adipolin                                             | 0.00 | 0.00 | 0.00 | 0.00 |
| Q19LI2 | A1bg     | Alpha-1B-glycoprotein                                | 0.00 | 0.02 | 0.00 | 0.00 |
| P31230 | Aimp1    | Alpha-synuclein                                      | 0.00 | 0.00 | 0.00 | 0.00 |
| P11859 | Agt      | Angiopoietin-1 receptor                              | 0.00 | 0.00 | 0.00 | 0.00 |
| Q9DCX2 | Atp5h    | ATP synthase subunit beta, mitochondrial             | 0.00 | 0.00 | 0.00 | 0.00 |
| P18293 | Npr1     | ATP synthase subunit d, mitochondrial                | 0.00 | 0.00 | 0.00 | 0.00 |
| P15535 | B4galt1  | Atrial natriuretic peptide receptor 1                | 0.00 | 0.00 | 0.00 | 0.00 |
| P15327 | Bpgm     | Bifunctional purine biosynthesis protein PURH        | 0.00 | 0.00 | 0.00 | 0.00 |
| Q3UZA1 | Rcsd1    | Calpastatin                                          | 0.00 | 0.00 | 0.00 | 0.00 |
| P13634 | Ca1      | CapZ-interacting protein                             | 0.00 | 0.00 | 0.00 | 0.00 |
| P23953 | Ces1c    | Carbonic anhydrase 3                                 | 0.00 | 0.00 | 0.00 | 0.00 |
| Q63880 | Ces3a    | Carboxylesterase 1D                                  | 0.00 | 0.00 | 0.00 | 0.00 |
| P16294 | F9       | Coactosin-like protein                               | 0.00 | 0.00 | 0.00 | 0.00 |
| P11087 | Col1a1   | Coiled-coil domain-containing protein 25             | 0.00 | 0.00 | 0.00 | 0.00 |
| Q60847 | Col12a1  | Collagen alpha-1(III) chain                          | 0.00 | 0.00 | 0.00 | 0.00 |
| Q3SXB8 | Colec11  | Collagen alpha-2(XI) chain                           | 0.00 | 0.00 | 0.00 | 0.00 |
| P01027 | C3       | Complement C2                                        | 0.00 | 0.00 | 0.00 | 0.00 |
| Q9WUM4 | Coro1c   | Core histone macro-H2A.2                             | 0.00 | 0.00 | 0.00 | 0.00 |
| Q06770 | Serpina6 | Coronin-1C                                           | 0.00 | 0.00 | 0.00 | 0.00 |
| O55111 | Dsg2     | Dermokine                                            | 0.00 | 0.00 | 0.00 | 0.00 |
| Q8R242 | Ctbs     | Desmoglein-2                                         | 0.00 | 0.00 | 0.00 | 0.00 |
| Q8BPB5 | Efemp1   | EF-hand domain-containing protein D2                 | 0.00 | 0.00 | 0.00 | 0.00 |
| P10126 | Eef1a1   | Electron transfer flavoprotein subunit beta          | 0.00 | 0.00 | 0.00 | 0.00 |
| Q9EQH2 | Erap1    | Elongation factor 1-beta                             | 0.00 | 0.00 | 0.00 | 0.00 |
| P60229 | Eif3e    | Eukaryotic initiation factor 4A-I                    | 0.00 | 0.00 | 0.00 | 0.00 |
| Q9QZD9 | Eif3i    | Eukaryotic translation initiation factor 3 subunit I | 0.00 | 0.00 | 0.00 | 0.00 |
| Q8BGD9 | Eif4b    | Eukaryotic translation initiation factor 4B          | 0.00 | 0.00 | 0.00 | 0.00 |

|        |         |                                                               |      |      |      |      |
|--------|---------|---------------------------------------------------------------|------|------|------|------|
| Q61508 | Ecm1    | Exostosin-1                                                   | 0.00 | 0.00 | 0.00 | 0.00 |
| O08795 | Prkcsh  | Glial fibrillary acidic protein                               | 0.00 | 0.00 | 0.00 | 0.00 |
| P35436 | Grin2a  | Glucosidase 2 subunit beta                                    | 0.00 | 0.00 | 0.00 | 0.00 |
| P15105 | Glul    | Glutamate receptor ionotropic, NMDA 2A                        | 0.00 | 0.00 | 0.00 | 0.00 |
| P46412 | Gpx3    | Glutamine synthetase                                          | 0.00 | 0.00 | 0.00 | 0.00 |
| P30115 | Gsta3   | Glutathione reductase, mitochondrial                          | 0.00 | 0.00 | 0.00 | 0.00 |
| Q8BH60 | Gopc    | Golgi-associated PDZ and coiled-coil motif-containing protein | 0.00 | 0.00 | 0.00 | 0.00 |
| Q9R257 | Hebp1   | Heme-binding protein 1                                        | 0.00 | 0.00 | 0.00 | 0.00 |
| P01878 | N/A     | Ig alpha chain C region                                       | 0.00 | 0.00 | 0.00 | 0.00 |
| P09535 | Igf2    | Insulin-like growth factor II                                 | 0.00 | 0.00 | 0.00 | 0.00 |
| P06796 | Csn3    | Kappa-casein                                                  | 0.00 | 0.00 | 0.00 | 0.00 |
| Q61781 | Krt14   | Keratin, type I cytoskeletal 14                               | 0.00 | 0.00 | 0.00 | 0.00 |
| Q9Z2K1 | Krt16   | Keratin, type I cytoskeletal 16                               | 0.00 | 0.00 | 0.00 | 0.00 |
| Q922U2 | Krt5    | Keratin, type II cytoskeletal 2 epidermal                     | 0.00 | 0.00 | 0.00 | 0.00 |
| Q3TTY5 | Krt2    | Keratin, type II cytoskeletal 2 oral                          | 0.00 | 0.00 | 0.00 | 0.00 |
| P11679 | Krt8    | Keratin, type II cytoskeletal 5                               | 0.00 | 0.00 | 0.00 | 0.00 |
| Q3UV17 | Krt76   | Keratin, type II cytoskeletal 8                               | 0.00 | 0.00 | 0.00 | 0.00 |
| Q60675 | Lama2   | Laminin subunit alpha-2                                       | 0.00 | 0.00 | 0.00 | 0.00 |
| P48356 | Lepr    | Leptin receptor                                               | 0.00 | 0.00 | 0.00 | 0.00 |
| Q8BSS9 | Ppfia2  | Liprin-alpha-2                                                | 0.00 | 0.00 | 0.00 | 0.00 |
| P34884 | Mif     | Macrophage migration inhibitory factor                        | 0.00 | 0.00 | 0.00 | 0.00 |
| Q9R0S3 | Mmp17   | Matrix metalloproteinase-17                                   | 0.00 | 0.00 | 0.00 | 0.00 |
| P25785 | Timp2   | Metalloproteinase inhibitor 2                                 | 0.00 | 0.00 | 0.00 | 0.00 |
| P11247 | Mpo     | Myeloperoxidase                                               | 0.00 | 0.00 | 0.00 | 0.00 |
| Q60605 | Myl6    | Myosin light polypeptide 6                                    | 0.00 | 0.00 | 0.00 | 0.00 |
| Q9CWS0 | Ddah1   | N(G),N(G)-dimethylarginine dimethylaminohydrolase 1           | 0.00 | 0.00 | 0.00 | 0.00 |
| Q8VDK1 | Nit1    | Nitrilase homolog 1                                           | 0.00 | 0.00 | 0.00 | 0.00 |
| Q78ZA7 | Nap1l4  | Nucleosome assembly protein 1-like 4                          | 0.00 | 0.00 | 0.00 | 0.00 |
| Q9QUR7 | Pin1    | Peptidyl-prolyl cis-trans isomerase NIMA-interacting 1        | 0.00 | 0.00 | 0.00 | 0.00 |
| O08807 | Prdx4   | Peroxiredoxin-4                                               | 0.00 | 0.00 | 0.00 | 0.00 |
| Q80XD8 | Prap1   | Proline-rich acidic protein 1                                 | 0.00 | 0.00 | 0.00 | 0.00 |
| P97372 | Psme2   | Proteasome activator complex subunit 2                        | 0.00 | 0.00 | 0.00 | 0.00 |
| Q7TNV0 | Dek     | Protein DEK                                                   | 0.00 | 0.00 | 0.00 | 0.00 |
| P09103 | P4hb    | Protein disulfide-isomerase                                   | 0.00 | 0.00 | 0.00 | 0.00 |
| P50543 | S100a11 | Protein S100-A11                                              | 0.00 | 0.00 | 0.00 | 0.00 |
| Q9DD06 | Rarres2 | Radixin                                                       | 0.00 | 0.00 | 0.00 | 0.00 |

|        |       |                                             |      |      |      |      |
|--------|-------|---------------------------------------------|------|------|------|------|
| P52430 | Pon1  | Serum deprivation-response protein          | 0.00 | 0.00 | 0.00 | 0.00 |
| Q923D4 | Sf3b5 | Spermine oxidase                            | 0.00 | 0.00 | 0.00 | 0.00 |
| Q8BND5 | Qsox1 | Splicing factor 3B subunit 5                | 0.00 | 0.00 | 0.00 | 0.00 |
| Q80YX1 | Tnc   | TBC1 domain family member 10A               | 0.00 | 0.00 | 0.00 | 0.00 |
| P35441 | Thbs1 | Thioredoxin                                 | 0.00 | 0.00 | 0.00 | 0.00 |
| P40142 | Tkt   | Transforming growth factor beta-1           | 0.00 | 0.00 | 0.00 | 0.00 |
| P07309 | Ttr   | Translocon-associated protein subunit alpha | 0.00 | 0.00 | 0.00 | 0.00 |
| Q06806 | Tie1  | Tropomyosin alpha-3 chain                   | 0.00 | 0.00 | 0.00 | 0.00 |
| P61089 | Ube2n | Tyrosine-protein kinase receptor Tie-1      | 0.00 | 0.00 | 0.00 | 0.00 |
| Q64339 | Isg15 | Ubiquitin-conjugating enzyme E2 N           | 0.00 | 0.00 | 0.00 | 0.00 |
| O88342 | Wdr1  | WD repeat-containing protein 1              | 0.00 | 0.00 | 0.00 | 0.00 |
